# Supplementary material for: Study on the Interaction of Plasma-Polymerized Hydrogel Coatings with Aqueous Solutions of Different pH
Source: MDPI journal article supplement (doi:10.3390/gels9030237), 2023-03-17
Supplement: s1 [file s1]

## Supporting information

### **Study on the Interaction of Plasma-Polymerized Hydrogel Coatings with Aqueous Solutions of Different pH**

*Monique Levien<sup>\*,1</sup>, Zahra Nasri<sup>2</sup>, Klaus-Dieter Weltmann<sup>1</sup>, Katja Fricke<sup>1</sup>*

<sup>1</sup>Junior Research Group Biosensing Surfaces, Leibniz Institute for Plasma Science and Technology (INP), 17489 Greifswald, Germany

Corresponding author: [monique.levien@inp-greifswald.de](mailto:monique.levien@inp-greifswald.de)

<sup>2</sup>Center for Innovation Competence Plasmatis, Leibniz Institute for Plasma Science and Technology (INP), 17489 Greifswald, Germany

**Figure S1.** Coating thicknesses (n=3) and wrinkle widths (n=10) of the hydrogel mixtures generated by the droplet method, measured before and after storage in water.

|               | Coating thickness ( $\mu\text{m}$ ): |                                       | Wrinkle width ( $\mu\text{m}$ ): |                                       |
|---------------|--------------------------------------|---------------------------------------|----------------------------------|---------------------------------------|
|               | as deposited                         | after storage in $\text{H}_2\text{O}$ | as deposited                     | after storage in $\text{H}_2\text{O}$ |
| <b>d-HD14</b> | $0.47 \pm 0.03$                      | $0.33 \pm 0.09$                       | $1.3 \pm 0.18$                   | $1.0 \pm 0.15$                        |
| <b>d-HD11</b> | $1.05 \pm 0.16$                      | $1.02 \pm 0.11$                       | $2.0 \pm 0.18$                   | $1.5 \pm 0.36$                        |
| <b>d-HD41</b> | $1.54 \pm 0.14$                      | $1.42 \pm 0.12$                       | $2.2 \pm 0.19$                   | $2.2 \pm 0.24$                        |

**Figure S2.** Coating thicknesses (n=3) and wrinkle widths (n=10) of the hydrogel mixtures (n=10) generated by the nebulizer method, measured before and after storage in water.

|               | Coating thickness ( $\mu\text{m}$ ): |                                       | Wrinkle width ( $\mu\text{m}$ ): |                                       |
|---------------|--------------------------------------|---------------------------------------|----------------------------------|---------------------------------------|
|               | as deposited                         | after storage in $\text{H}_2\text{O}$ | as deposited                     | after storage in $\text{H}_2\text{O}$ |
| <b>n-HD14</b> | $0.14 \pm 0.00$                      | $0.15 \pm 0.02$                       | No wrinkles                      | No wrinkles                           |
| <b>n-HD11</b> | $0.40 \pm 0.06$                      | $0.20 \pm 0.01$                       | $1.6 \pm 0.43$                   | $1.4 \pm 0.28$                        |
| <b>n-HD41</b> | $0.59 \pm 0.07$                      | $0.40 \pm 0.04$                       | $1.7 \pm 0.14$                   | $1.5 \pm 0.28$                        |

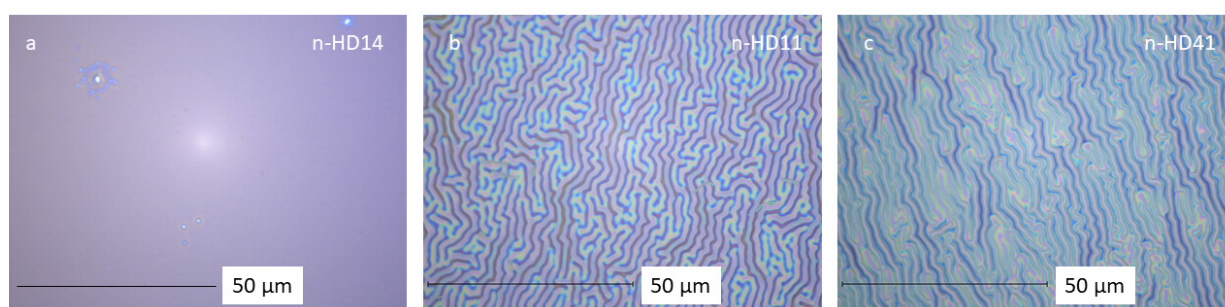

**Figure S3.** Microscopic images of the hydrogel films n-HD14, n-HD11 and n-HD41 at 1500x magnification.

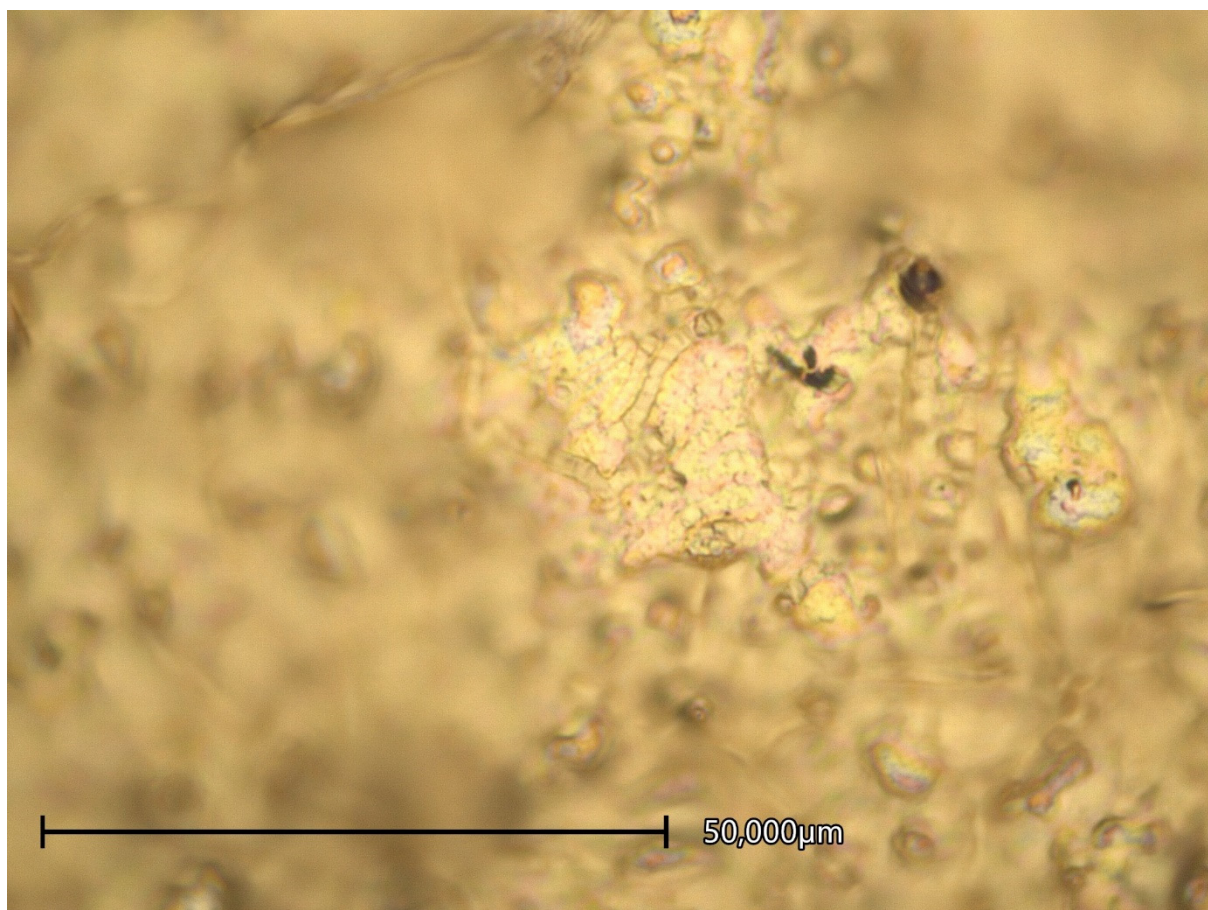

**Figure S4.** Optical microscope image (1500x magnification) of the hydrogel coatings HD41 deposited on gold, generated by the droplet method.

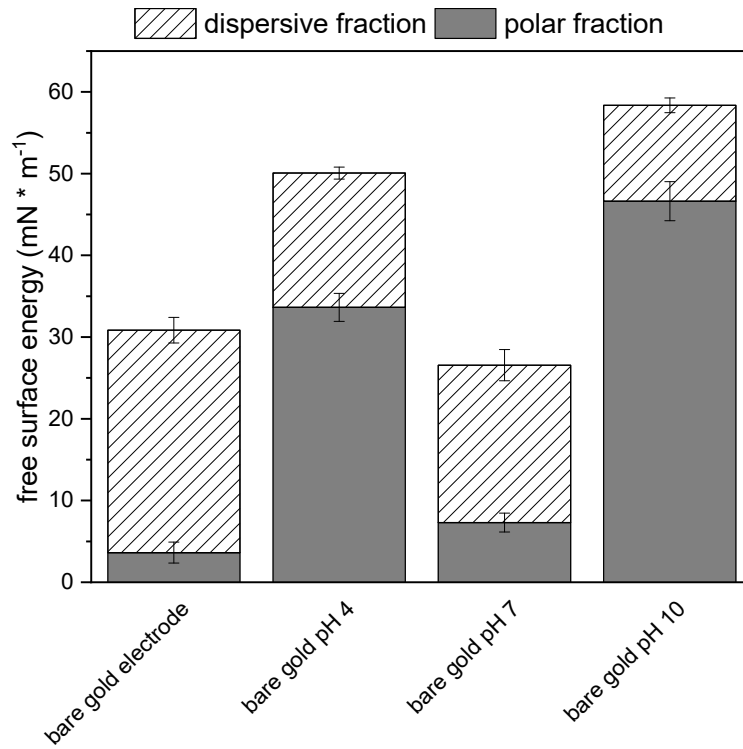

**Figure S5.** Surface free energy of the bare gold electrode and the bare gold electrode stored in different pH solutions.

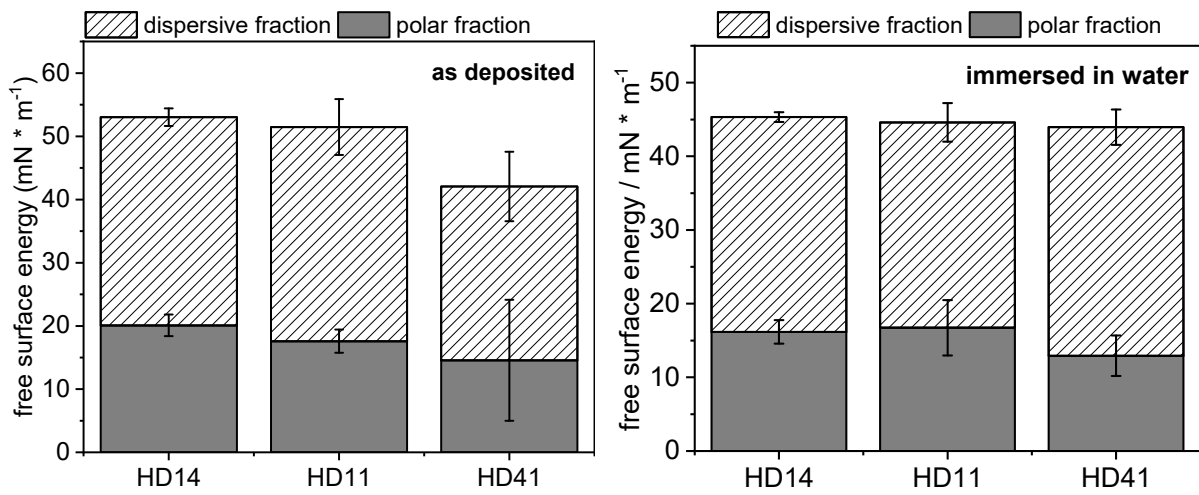

**Figure S6.** Surface free energy of the hydrogels mixtures generated by the nebulizer method ( left: as-deposited, right: after immersion in water for 24 h) divided into dispersive and polar fraction.

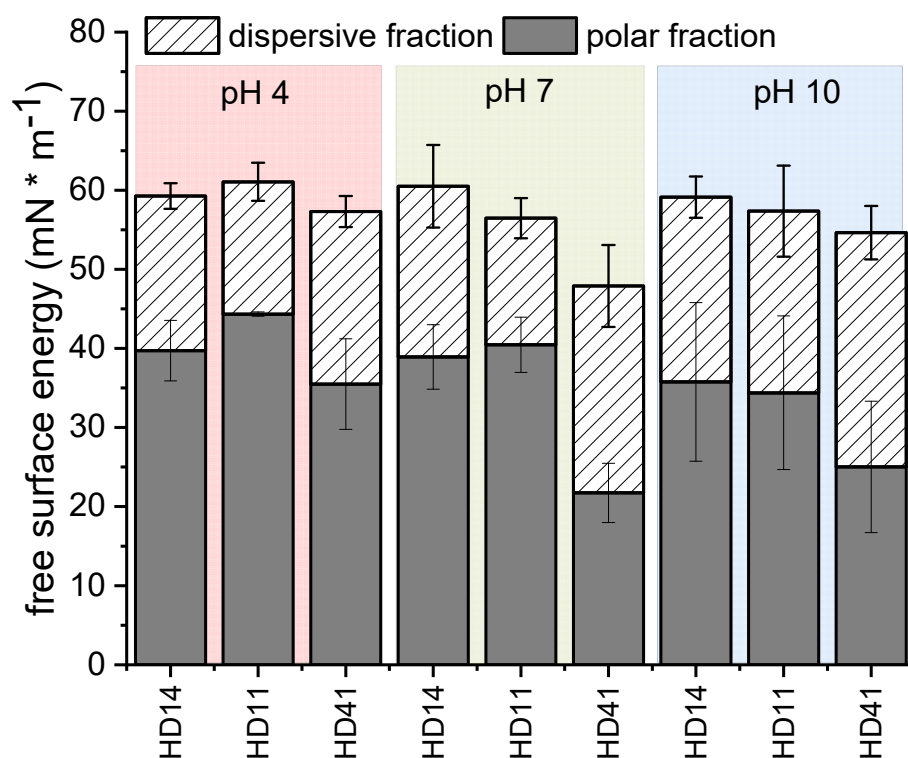

**Figure S7.** Surface free energy of the n-HD mixtures dried from different pH solutions.

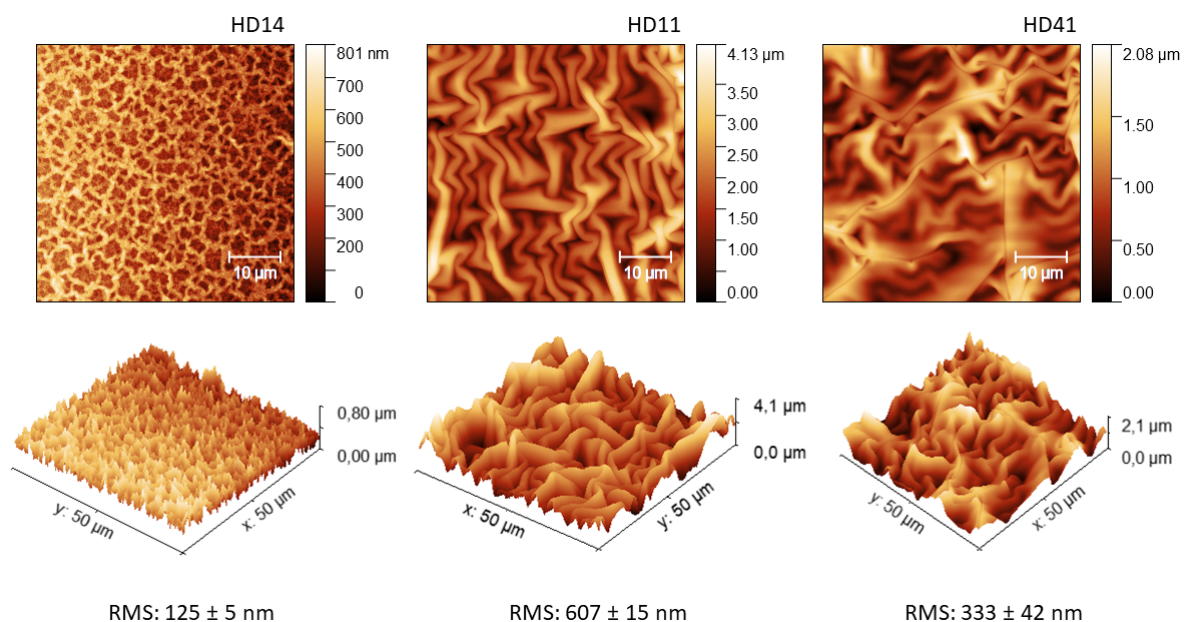

**Figure S8.** AFM images of the plasma-polymerized hydrogel coatings d-HD14, d-HD11, d-HD41 deposited on a smooth glass substrate.



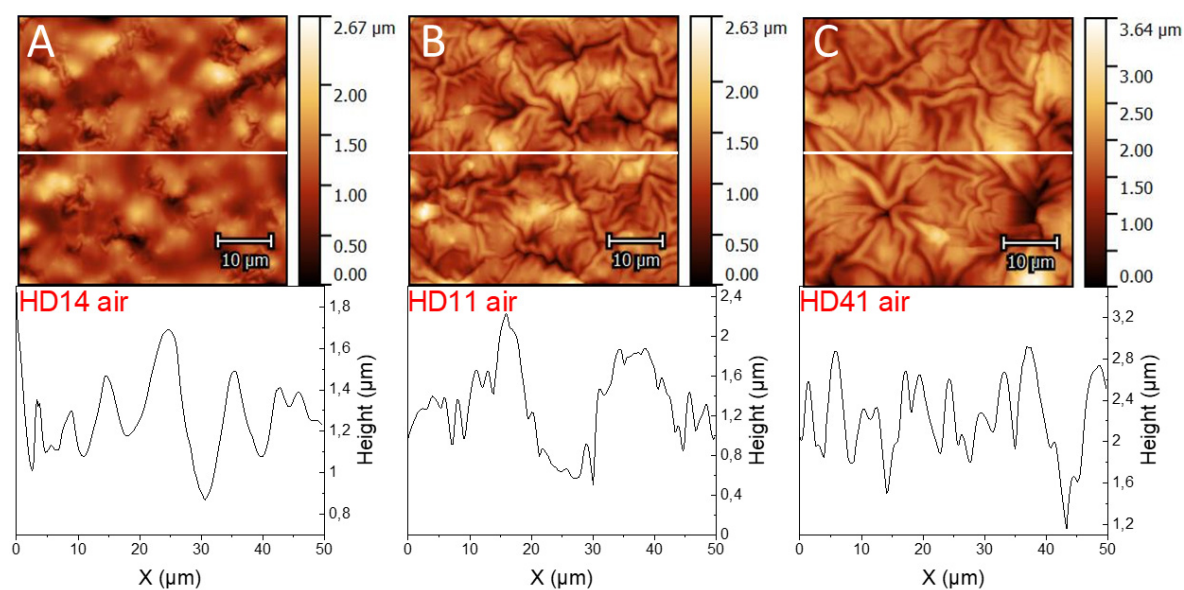

**Figure S9.** AFM images and the corresponding height profiles of the plasma-polymerized hydrogel coatings d-HD14 (A), d-HD11 (B) d-HD41 (C) deposited on gold electrodes.

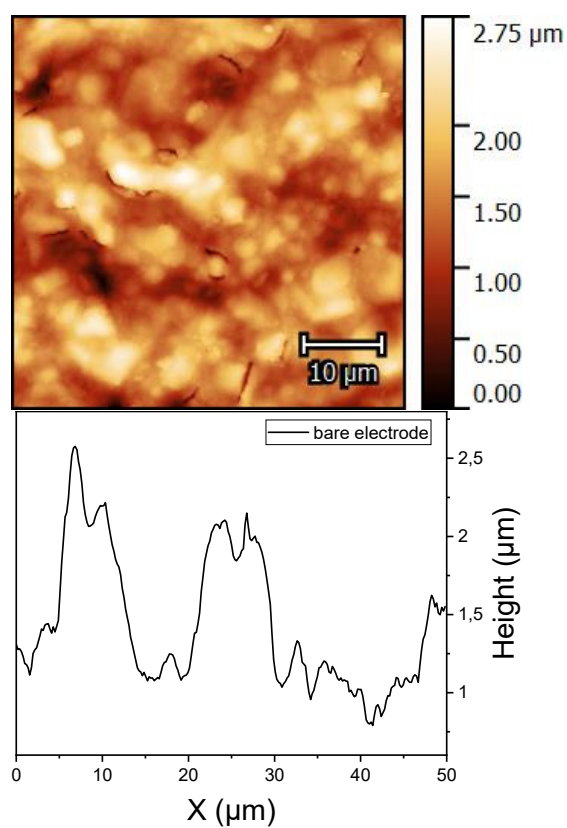

**Figure S10.** AFM image and the corresponding height profile of the bare gold electrode.

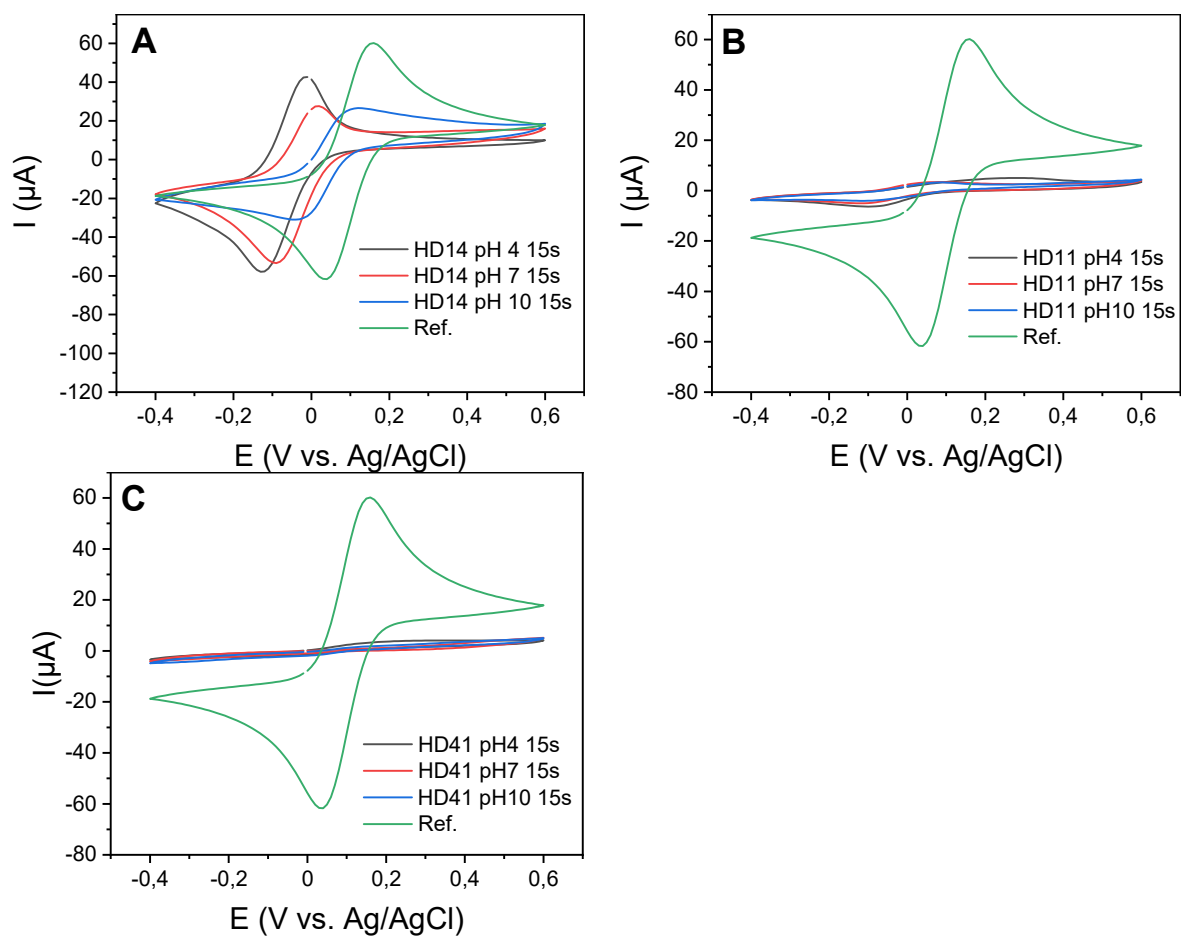

**Figure S11.** Cyclic voltammograms (A-C) of the plasma polymerized hydrogel mixtures (generated by the nebulizer method) in different pH buffer solutions.
